# Supplementary material
Source: Springer Nature journal article supplement (https://www.springermedizin.de/resource/supplementary/13075_2013_4411_MOESM3_ESM.pdf/10110356)
Supplement: MOESM3 [file 10110356]

## STUDY 2

### Evaluation of Item Difficulty

Participants drawn from the Initial Participant Pool (Figure 1)

Participants (n = 1,235) invited by mailed questionnaire to respond to new floor or ceiling items and PROMIS PF-10 items for evaluation of item difficulty

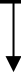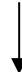

#### Ceiling Item Comparison

(n = 835)

Composed of rheumatoid arthritis and osteoarthritis study participants and participants from studies of healthy aging (n = 632) and ultra-marathoners (n = 203)

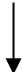

**Respondents**

(n = 637)

#### Floor Item Comparison

(n = 400)

Composed of rheumatoid arthritis and osteoarthritis study participants and participants from studies of healthy aging (n = 370) and nursing home participants (n = 30)

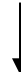

**Respondents**

(n = 246)
